# Supplementary material for: Ants contribute to pollination but not to reproduction in a rare calcareous grassland forb
Source: PeerJ. 2018 Feb 19;6:e4369. doi: 10.7717/peerj.4369 (PMC5822835; doi:10.7717/peerj.4369)
Supplement: Supplemental Information 1 — Data show numbers of ants and winged insects visiting cyathia during morning and afternoon observations. [file peerj-06-4369-s001.xlsx]

## Sheet: Sheet1
Flower	Date	Time	Weather	Species	Visits
1	2006-08-16	morning	Rainy	Formica	0		Values assigned to Weather for statistical analysis:
1	2006-08-16	afternoon	Sunny	Formica	0		0=Rainy
1	2006-08-17	morning	Sunny	Formica	1		3=Cloudy
1	2006-08-17	afternoon	Sunny	Formica	2		4=Sunny
1	2006-08-18	morning	Cloudy	Formica	1
1	2006-08-18	afternoon	Sunny	Formica	4
1	2006-08-21	morning	Cloudy	Formica	2
1	2006-08-21	afternoon	Cloudy	Formica	0
1	2006-08-22	morning	Cloudy	Formica	0
1	2006-08-22	afternoon	Cloudy	Formica	1
1	2006-08-23	morning	Sunny	Formica	0
1	2006-08-23	afternoon	Sunny	Formica	2
1	2006-08-24	morning	Sunny	Formica	1
1	2006-08-24	afternoon	Rainy	Formica	0
1	2006-08-25	afternoon	Cloudy	Formica	0
1	2006-08-26	morning	Sunny	Formica	0
1	2006-08-26	afternoon	Cloudy	Formica	0
1	2006-08-27	morning	Cloudy	Formica	0
1	2006-08-27	afternoon	Cloudy	Formica	3
1	2006-08-28	morning	Cloudy	Formica	3
1	2006-08-29	morning	Rainy	Formica	4
1	2006-08-29	afternoon	Sunny	Formica	5
1	2006-08-30	morning	Sunny	Formica	3
1	2006-08-31	afternoon	Cloudy	Formica	1
2	2006-08-16	morning	Rainy	Formica	1
2	2006-08-16	afternoon	Sunny	Formica	3
2	2006-08-17	morning	Sunny	Formica	1
2	2006-08-17	afternoon	Sunny	Formica	1
2	2006-08-18	morning	Cloudy	Formica	0
2	2006-08-18	afternoon	Sunny	Formica	2
2	2006-08-21	morning	Cloudy	Formica	1
2	2006-08-21	afternoon	Cloudy	Formica	1
2	2006-08-22	morning	Cloudy	Formica	1
2	2006-08-22	afternoon	Cloudy	Formica	0
2	2006-08-23	morning	Sunny	Formica	2
2	2006-08-23	afternoon	Sunny	Formica	1
2	2006-08-24	morning	Sunny	Formica	2
2	2006-08-24	afternoon	Rainy	Formica	1
2	2006-08-25	afternoon	Sunny	Formica	2
2	2006-08-26	morning	Sunny	Formica	1
2	2006-08-26	afternoon	Cloudy	Formica	0
2	2006-08-27	morning	Cloudy	Formica	0
2	2006-08-27	afternoon	Cloudy	Formica	1
2	2006-08-28	morning	Cloudy	Formica	0
2	2006-08-29	morning	Rainy	Formica	0
2	2006-08-29	afternoon	Sunny	Formica	1
2	2006-08-30	morning	Sunny	Formica	0
2	2006-08-31	afternoon	Cloudy	Formica	0
3	2006-08-16	morning	Rainy	Formica	1
3	2006-08-16	afternoon	Sunny	Formica	2
3	2006-08-17	morning	Sunny	Formica	1
3	2006-08-17	afternoon	Sunny	Formica	1
3	2006-08-18	morning	Cloudy	Formica	1
3	2006-08-18	afternoon	Sunny	Formica	1
3	2006-08-21	morning	Cloudy	Formica	1
3	2006-08-21	afternoon	Cloudy	Formica	2
3	2006-08-22	morning	Cloudy	Formica	1
3	2006-08-22	afternoon	Cloudy	Formica	0
3	2006-08-23	morning	Sunny	Formica	1
3	2006-08-23	afternoon	Sunny	Formica	0
3	2006-08-24	morning	Sunny	Formica	1
3	2006-08-24	afternoon	Rainy	Formica	0
3	2006-08-25	afternoon	Cloudy	Formica	0
3	2006-08-26	morning	Sunny	Formica	1
3	2006-08-26	afternoon	Cloudy	Formica	0
3	2006-08-27	morning	Cloudy	Formica	2
3	2006-08-27	afternoon	Cloudy	Formica	0
3	2006-08-28	morning	Cloudy	Formica	0
3	2006-08-29	morning	Rainy	Formica	0
3	2006-08-29	afternoon	Sunny	Formica	0
3	2006-08-30	morning	Sunny	Formica	0
3	2006-08-31	afternoon	Cloudy	Formica	0
4	2006-08-16	morning	Rainy	Formica	0
4	2006-08-16	afternoon	Sunny	Formica	2
4	2006-08-17	morning	Sunny	Formica	0
4	2006-08-17	afternoon	Sunny	Formica	1
4	2006-08-18	morning	Cloudy	Formica	0
4	2006-08-18	afternoon	Sunny	Formica	2
4	2006-08-21	morning	Cloudy	Formica	4
4	2006-08-21	afternoon	Cloudy	Formica	0
4	2006-08-22	morning	Cloudy	Formica	0
4	2006-08-22	afternoon	Cloudy	Formica	0
4	2006-08-23	morning	Sunny	Formica	2
4	2006-08-23	afternoon	Sunny	Formica	1
4	2006-08-24	morning	Sunny	Formica	3
4	2006-08-24	afternoon	Rainy	Formica	6
4	2006-08-25	afternoon	Cloudy	Formica	4
4	2006-08-26	morning	Sunny	Formica	1
4	2006-08-26	afternoon	Cloudy	Formica	2
4	2006-08-27	morning	Cloudy	Formica	0
4	2006-08-27	afternoon	Cloudy	Formica	1
4	2006-08-28	morning	Cloudy	Formica	1
4	2006-08-29	morning	Rainy	Formica	2
4	2006-08-29	afternoon	Sunny	Formica	2
4	2006-08-30	morning	Sunny	Formica	0
4	2006-08-31	afternoon	Cloudy	Formica	2
5	2006-08-16	morning	Rainy	Formica	0
5	2006-08-16	afternoon	Sunny	Formica	4
5	2006-08-17	morning	Sunny	Formica	4
5	2006-08-17	afternoon	Sunny	Formica	5
5	2006-08-18	morning	Cloudy	Formica	1
5	2006-08-18	afternoon	Sunny	Formica	3
5	2006-08-21	morning	Cloudy	Formica	4
5	2006-08-21	afternoon	Cloudy	Formica	1
5	2006-08-22	morning	Cloudy	Formica	0
5	2006-08-22	afternoon	Cloudy	Formica	2
5	2006-08-23	morning	Sunny	Formica	3
5	2006-08-23	afternoon	Sunny	Formica	2
5	2006-08-24	morning	Sunny	Formica	3
5	2006-08-24	afternoon	Rainy	Formica	2
5	2006-08-25	afternoon	Cloudy	Formica	2
5	2006-08-26	morning	Sunny	Formica	3
5	2006-08-26	afternoon	Cloudy	Formica	0
5	2006-08-27	morning	Cloudy	Formica	2
5	2006-08-27	afternoon	Cloudy	Formica	1
5	2006-08-28	morning	Cloudy	Formica	2
5	2006-08-29	morning	Rainy	Formica	3
5	2006-08-29	afternoon	Sunny	Formica	1
5	2006-08-30	morning	Sunny	Formica	2
5	2006-08-31	afternoon	Cloudy	Formica	2
6	2006-08-16	morning	Rainy	Formica	0
6	2006-08-16	afternoon	Sunny	Formica	0
6	2006-08-17	morning	Sunny	Formica	2
6	2006-08-17	afternoon	Sunny	Formica	3
6	2006-08-18	morning	Cloudy	Formica	0
6	2006-08-18	afternoon	Sunny	Formica	2
6	2006-08-21	morning	Cloudy	Formica	4
6	2006-08-21	afternoon	Cloudy	Formica	2
6	2006-08-22	morning	Cloudy	Formica	2
6	2006-08-22	afternoon	Cloudy	Formica	3
6	2006-08-23	morning	Sunny	Formica	1
6	2006-08-23	afternoon	Sunny	Formica	3
6	2006-08-24	morning	Sunny	Formica	4
6	2006-08-24	afternoon	Rainy	Formica	2
6	2006-08-25	afternoon	Cloudy	Formica	3
6	2006-08-26	morning	Sunny	Formica	2
6	2006-08-26	afternoon	Cloudy	Formica	0
6	2006-08-27	morning	Cloudy	Formica	1
6	2006-08-27	afternoon	Cloudy	Formica	1
6	2006-08-28	morning	Cloudy	Formica	0
6	2006-08-29	morning	Rainy	Formica	0
6	2006-08-29	afternoon	Sunny	Formica	2
6	2006-08-30	morning	Sunny	Formica	2
6	2006-08-31	afternoon	Cloudy	Formica	0
7	2006-08-16	morning	Rainy	Formica	1
7	2006-08-16	afternoon	Sunny	Formica	1
7	2006-08-17	morning	Sunny	Formica	2
7	2006-08-17	afternoon	Sunny	Formica	1
7	2006-08-18	morning	Cloudy	Formica	1
7	2006-08-18	afternoon	Sunny	Formica	0
7	2006-08-21	morning	Cloudy	Formica	2
7	2006-08-21	afternoon	Cloudy	Formica	4
7	2006-08-22	morning	Cloudy	Formica	2
7	2006-08-22	afternoon	Cloudy	Formica	5
7	2006-08-23	morning	Sunny	Formica	4
7	2006-08-23	afternoon	Sunny	Formica	4
7	2006-08-24	morning	Sunny	Formica	1
7	2006-08-24	afternoon	Rainy	Formica	1
7	2006-08-25	afternoon	Cloudy	Formica	1
7	2006-08-26	morning	Sunny	Formica	1
7	2006-08-26	afternoon	Cloudy	Formica	0
7	2006-08-27	morning	Cloudy	Formica	1
7	2006-08-27	afternoon	Cloudy	Formica	3
7	2006-08-28	morning	Cloudy	Formica	1
7	2006-08-29	morning	Rainy	Formica	0
7	2006-08-29	afternoon	Sunny	Formica	0
7	2006-08-30	morning	Sunny	Formica	0
7	2006-08-31	afternoon	Cloudy	Formica	3
8	2006-08-16	morning	Rainy	Formica	0
8	2006-08-16	afternoon	Sunny	Formica	0
8	2006-08-17	morning	Sunny	Formica	1
8	2006-08-17	afternoon	Sunny	Formica	0
8	2006-08-18	morning	Cloudy	Formica	0
8	2006-08-18	afternoon	Sunny	Formica	0
8	2006-08-21	morning	Cloudy	Formica	2
8	2006-08-21	afternoon	Cloudy	Formica	0
8	2006-08-22	morning	Cloudy	Formica	1
8	2006-08-22	afternoon	Cloudy	Formica	5
8	2006-08-23	morning	Sunny	Formica	4
8	2006-08-23	afternoon	Sunny	Formica	3
8	2006-08-24	morning	Sunny	Formica	2
8	2006-08-24	afternoon	Rainy	Formica	0
8	2006-08-25	afternoon	Cloudy	Formica	1
8	2006-08-26	morning	Sunny	Formica	1
8	2006-08-26	afternoon	Cloudy	Formica	0
8	2006-08-27	morning	Cloudy	Formica	0
8	2006-08-27	afternoon	Cloudy	Formica	0
8	2006-08-28	morning	Cloudy	Formica	0
8	2006-08-29	morning	Rainy	Formica	0
8	2006-08-29	afternoon	Sunny	Formica	2
8	2006-08-30	morning	Sunny	Formica	1
8	2006-08-31	afternoon	Cloudy	Formica	0
9	2006-08-16	morning	Rainy	Formica	0
9	2006-08-16	afternoon	Sunny	Formica	2
9	2006-08-17	morning	Sunny	Formica	0
9	2006-08-17	afternoon	Sunny	Formica	0
9	2006-08-18	morning	Cloudy	Formica	3
9	2006-08-18	afternoon	Sunny	Formica	4
9	2006-08-21	morning	Cloudy	Formica	4
9	2006-08-21	afternoon	Cloudy	Formica	3
9	2006-08-22	morning	Cloudy	Formica	2
9	2006-08-22	afternoon	Cloudy	Formica	2
9	2006-08-23	morning	Sunny	Formica	4
9	2006-08-23	afternoon	Sunny	Formica	3
9	2006-08-24	morning	Sunny	Formica	3
9	2006-08-24	afternoon	Rainy	Formica	1
9	2006-08-25	afternoon	Cloudy	Formica	2
9	2006-08-26	morning	Sunny	Formica	4
9	2006-08-26	afternoon	Cloudy	Formica	0
9	2006-08-27	morning	Cloudy	Formica	0
9	2006-08-27	afternoon	Cloudy	Formica	1
9	2006-08-28	morning	Cloudy	Formica	2
9	2006-08-29	morning	Rainy	Formica	1
9	2006-08-29	afternoon	Sunny	Formica	1
9	2006-08-30	morning	Sunny	Formica	1
9	2006-08-31	afternoon	Cloudy	Formica	1
10	2006-08-16	morning	Rainy	Formica	1
10	2006-08-16	afternoon	Sunny	Formica	2
10	2006-08-17	morning	Sunny	Formica	2
10	2006-08-17	afternoon	Sunny	Formica	2
10	2006-08-18	morning	Cloudy	Formica	1
10	2006-08-18	afternoon	Sunny	Formica	4
10	2006-08-21	morning	Cloudy	Formica	2
10	2006-08-21	afternoon	Cloudy	Formica	2
10	2006-08-22	morning	Cloudy	Formica	1
10	2006-08-22	afternoon	Cloudy	Formica	2
10	2006-08-23	morning	Sunny	Formica	4
10	2006-08-23	afternoon	Sunny	Formica	2
10	2006-08-24	morning	Sunny	Formica	2
10	2006-08-24	afternoon	Rainy	Formica	0
10	2006-08-25	afternoon	Cloudy	Formica	1
10	2006-08-26	morning	Sunny	Formica	3
10	2006-08-26	afternoon	Cloudy	Formica	0
10	2006-08-27	morning	Cloudy	Formica	0
10	2006-08-27	afternoon	Cloudy	Formica	0
10	2006-08-28	morning	Cloudy	Formica	0
10	2006-08-29	morning	Rainy	Formica	0
10	2006-08-29	afternoon	Sunny	Formica	0
10	2006-08-30	morning	Sunny	Formica	1
10	2006-08-31	afternoon	Cloudy	Formica	2
11	2006-08-16	morning	Rainy	Formica	0
11	2006-08-16	afternoon	Sunny	Formica	2
11	2006-08-17	morning	Sunny	Formica	3
11	2006-08-17	afternoon	Sunny	Formica	3
11	2006-08-18	morning	Cloudy	Formica	1
11	2006-08-18	afternoon	Sunny	Formica	5
11	2006-08-21	morning	Cloudy	Formica	6
11	2006-08-21	afternoon	Cloudy	Formica	2
11	2006-08-22	morning	Cloudy	Formica	3
11	2006-08-22	afternoon	Cloudy	Formica	1
11	2006-08-23	morning	Sunny	Formica	5
11	2006-08-23	afternoon	Sunny	Formica	3
11	2006-08-24	morning	Sunny	Formica	3
11	2006-08-24	afternoon	Rainy	Formica	0
11	2006-08-25	afternoon	Cloudy	Formica	1
11	2006-08-26	morning	Sunny	Formica	3
11	2006-08-26	afternoon	Cloudy	Formica	0
11	2006-08-27	morning	Cloudy	Formica	0
11	2006-08-27	afternoon	Cloudy	Formica	0
11	2006-08-28	morning	Cloudy	Formica	0
11	2006-08-29	morning	Rainy	Formica	0
11	2006-08-29	afternoon	Sunny	Formica	0
11	2006-08-30	morning	Sunny	Formica	0
11	2006-08-31	afternoon	Cloudy	Formica	2
12	2006-08-16	morning	Rainy	Formica	0
12	2006-08-16	afternoon	Sunny	Formica	2
12	2006-08-17	morning	Sunny	Formica	1
12	2006-08-17	afternoon	Sunny	Formica	3
12	2006-08-18	morning	Cloudy	Formica	1
12	2006-08-18	afternoon	Sunny	Formica	6
12	2006-08-21	morning	Cloudy	Formica	4
12	2006-08-21	afternoon	Cloudy	Formica	3
12	2006-08-22	morning	Cloudy	Formica	1
12	2006-08-22	afternoon	Cloudy	Formica	2
12	2006-08-23	morning	Sunny	Formica	2
12	2006-08-23	afternoon	Sunny	Formica	1
12	2006-08-24	morning	Sunny	Formica	1
12	2006-08-24	afternoon	Rainy	Formica	1
12	2006-08-25	afternoon	Cloudy	Formica	1
12	2006-08-26	morning	Sunny	Formica	4
12	2006-08-26	afternoon	Cloudy	Formica	1
12	2006-08-27	morning	Cloudy	Formica	0
12	2006-08-27	afternoon	Cloudy	Formica	0
12	2006-08-28	morning	Cloudy	Formica	0
12	2006-08-29	morning	Rainy	Formica	0
12	2006-08-29	afternoon	Sunny	Formica	0
12	2006-08-30	morning	Sunny	Formica	0
12	2006-08-31	afternoon	Cloudy	Formica	1
13	2006-08-16	morning	Rainy	Formica	0
13	2006-08-16	afternoon	Sunny	Formica	0
13	2006-08-17	morning	Sunny	Formica	0
13	2006-08-17	afternoon	Sunny	Formica	1
13	2006-08-18	morning	Cloudy	Formica	0
13	2006-08-18	afternoon	Sunny	Formica	0
13	2006-08-21	morning	Cloudy	Formica	3
13	2006-08-21	afternoon	Cloudy	Formica	1
13	2006-08-22	morning	Cloudy	Formica	0
13	2006-08-22	afternoon	Cloudy	Formica	1
13	2006-08-23	morning	Sunny	Formica	3
13	2006-08-23	afternoon	Sunny	Formica	1
13	2006-08-24	morning	Sunny	Formica	2
13	2006-08-24	afternoon	Rainy	Formica	0
13	2006-08-25	afternoon	Cloudy	Formica	0
13	2006-08-26	morning	Sunny	Formica	1
13	2006-08-26	afternoon	Cloudy	Formica	0
13	2006-08-27	morning	Cloudy	Formica	1
13	2006-08-27	afternoon	Cloudy	Formica	2
13	2006-08-28	morning	Cloudy	Formica	3
13	2006-08-29	morning	Rainy	Formica	2
13	2006-08-29	afternoon	Sunny	Formica	2
13	2006-08-30	morning	Sunny	Formica	2
13	2006-08-31	afternoon	Cloudy	Formica	2
14	2006-08-16	morning	Rainy	Formica	0
14	2006-08-16	afternoon	Sunny	Formica	2
14	2006-08-17	morning	Sunny	Formica	3
14	2006-08-17	afternoon	Sunny	Formica	4
14	2006-08-18	morning	Cloudy	Formica	3
14	2006-08-18	afternoon	Sunny	Formica	2
14	2006-08-21	morning	Cloudy	Formica	1
14	2006-08-21	afternoon	Cloudy	Formica	1
14	2006-08-22	morning	Cloudy	Formica	2
14	2006-08-22	afternoon	Cloudy	Formica	3
14	2006-08-23	morning	Sunny	Formica	1
14	2006-08-23	afternoon	Sunny	Formica	0
14	2006-08-24	morning	Sunny	Formica	3
14	2006-08-24	afternoon	Rainy	Formica	0
14	2006-08-25	afternoon	Cloudy	Formica	3
14	2006-08-26	morning	Sunny	Formica	0
14	2006-08-26	afternoon	Cloudy	Formica	0
14	2006-08-27	morning	Cloudy	Formica	1
14	2006-08-27	afternoon	Cloudy	Formica	1
14	2006-08-28	morning	Cloudy	Formica	1
14	2006-08-29	morning	Rainy	Formica	1
14	2006-08-29	afternoon	Sunny	Formica	2
14	2006-08-30	morning	Sunny	Formica	0
14	2006-08-31	afternoon	Cloudy	Formica	0
15	2006-08-16	morning	Rainy	Formica	0
15	2006-08-16	afternoon	Sunny	Formica	0
15	2006-08-17	morning	Sunny	Formica	1
15	2006-08-17	afternoon	Sunny	Formica	2
15	2006-08-18	morning	Cloudy	Formica	0
15	2006-08-18	afternoon	Sunny	Formica	0
15	2006-08-21	morning	Cloudy	Formica	3
15	2006-08-21	afternoon	Cloudy	Formica	1
15	2006-08-22	morning	Cloudy	Formica	0
15	2006-08-22	afternoon	Cloudy	Formica	1
15	2006-08-23	morning	Sunny	Formica	1
15	2006-08-23	afternoon	Sunny	Formica	4
15	2006-08-24	morning	Sunny	Formica	3
15	2006-08-24	afternoon	Rainy	Formica	0
15	2006-08-25	afternoon	Cloudy	Formica	2
15	2006-08-26	morning	Sunny	Formica	3
15	2006-08-26	afternoon	Cloudy	Formica	0
15	2006-08-27	morning	Cloudy	Formica	0
15	2006-08-27	afternoon	Cloudy	Formica	1
15	2006-08-28	morning	Cloudy	Formica	0
15	2006-08-29	morning	Rainy	Formica	0
15	2006-08-29	afternoon	Sunny	Formica	0
15	2006-08-30	morning	Sunny	Formica	1
15	2006-08-31	afternoon	Cloudy	Formica	0
16	2006-08-16	morning	Rainy	Formica	0
16	2006-08-16	afternoon	Sunny	Formica	0
16	2006-08-17	morning	Sunny	Formica	0
16	2006-08-17	afternoon	Sunny	Formica	0
16	2006-08-18	morning	Cloudy	Formica	0
16	2006-08-18	afternoon	Sunny	Formica	0
16	2006-08-21	morning	Cloudy	Formica	0
16	2006-08-21	afternoon	Cloudy	Formica	0
16	2006-08-22	morning	Cloudy	Formica	0
16	2006-08-22	afternoon	Cloudy	Formica	0
16	2006-08-23	morning	Sunny	Formica	3
16	2006-08-23	afternoon	Sunny	Formica	0
16	2006-08-24	morning	Sunny	Formica	0
16	2006-08-24	afternoon	Rainy	Formica	0
16	2006-08-25	afternoon	Cloudy	Formica	0
16	2006-08-26	morning	Sunny	Formica	0
16	2006-08-26	afternoon	Cloudy	Formica	0
16	2006-08-27	morning	Cloudy	Formica	0
16	2006-08-27	afternoon	Cloudy	Formica	0
16	2006-08-28	morning	Cloudy	Formica	1
16	2006-08-29	morning	Rainy	Formica	0
16	2006-08-29	afternoon	Sunny	Formica	0
16	2006-08-30	morning	Sunny	Formica	0
16	2006-08-31	afternoon	Cloudy	Formica	0
17	2006-08-16	morning	Rainy	Formica	0
17	2006-08-16	afternoon	Sunny	Formica	1
17	2006-08-17	morning	Sunny	Formica	1
17	2006-08-17	afternoon	Sunny	Formica	2
17	2006-08-18	morning	Cloudy	Formica	1
17	2006-08-18	afternoon	Sunny	Formica	4
17	2006-08-21	morning	Cloudy	Formica	0
17	2006-08-21	afternoon	Cloudy	Formica	0
17	2006-08-22	morning	Cloudy	Formica	0
17	2006-08-22	afternoon	Cloudy	Formica	0
17	2006-08-23	morning	Sunny	Formica	3
17	2006-08-23	afternoon	Sunny	Formica	2
17	2006-08-24	morning	Sunny	Formica	2
17	2006-08-24	afternoon	Rainy	Formica	1
17	2006-08-25	afternoon	Cloudy	Formica	0
17	2006-08-26	morning	Sunny	Formica	3
17	2006-08-26	afternoon	Cloudy	Formica	0
17	2006-08-27	morning	Cloudy	Formica	0
17	2006-08-27	afternoon	Cloudy	Formica	0
17	2006-08-28	morning	Cloudy	Formica	0
17	2006-08-29	morning	Rainy	Formica	0
17	2006-08-29	afternoon	Sunny	Formica	0
17	2006-08-30	morning	Sunny	Formica	0
17	2006-08-31	afternoon	Cloudy	Formica	2
18	2006-08-16	morning	Rainy	Formica	0
18	2006-08-16	afternoon	Sunny	Formica	0
18	2006-08-17	morning	Sunny	Formica	2
18	2006-08-17	afternoon	Sunny	Formica	1
18	2006-08-18	morning	Cloudy	Formica	0
18	2006-08-18	afternoon	Sunny	Formica	0
18	2006-08-21	morning	Cloudy	Formica	1
18	2006-08-21	afternoon	Cloudy	Formica	0
18	2006-08-22	morning	Cloudy	Formica	0
18	2006-08-22	afternoon	Cloudy	Formica	0
18	2006-08-23	morning	Sunny	Formica	4
18	2006-08-23	afternoon	Sunny	Formica	2
18	2006-08-24	morning	Sunny	Formica	1
18	2006-08-24	afternoon	Rainy	Formica	1
18	2006-08-25	afternoon	Cloudy	Formica	3
18	2006-08-26	morning	Sunny	Formica	5
18	2006-08-26	afternoon	Cloudy	Formica	1
18	2006-08-27	morning	Cloudy	Formica	0
18	2006-08-27	afternoon	Cloudy	Formica	1
18	2006-08-28	morning	Cloudy	Formica	2
18	2006-08-29	morning	Rainy	Formica	0
18	2006-08-29	afternoon	Sunny	Formica	0
18	2006-08-30	morning	Sunny	Formica	0
18	2006-08-31	afternoon	Cloudy	Formica	3
19	2006-08-16	morning	Rainy	Formica	0
19	2006-08-16	afternoon	Sunny	Formica	1
19	2006-08-17	morning	Sunny	Formica	3
19	2006-08-17	afternoon	Sunny	Formica	1
19	2006-08-18	morning	Cloudy	Formica	0
19	2006-08-18	afternoon	Sunny	Formica	0
19	2006-08-21	morning	Cloudy	Formica	0
19	2006-08-21	afternoon	Cloudy	Formica	0
19	2006-08-22	morning	Cloudy	Formica	0
19	2006-08-22	afternoon	Cloudy	Formica	0
19	2006-08-23	morning	Sunny	Formica	0
19	2006-08-23	afternoon	Sunny	Formica	0
19	2006-08-24	morning	Sunny	Formica	3
19	2006-08-24	afternoon	Rainy	Formica	1
19	2006-08-25	afternoon	Cloudy	Formica	5
19	2006-08-26	morning	Sunny	Formica	3
19	2006-08-26	afternoon	Cloudy	Formica	0
19	2006-08-27	morning	Cloudy	Formica	1
19	2006-08-27	afternoon	Cloudy	Formica	0
19	2006-08-28	morning	Cloudy	Formica	0
19	2006-08-29	morning	Rainy	Formica	0
19	2006-08-29	afternoon	Sunny	Formica	0
19	2006-08-30	morning	Sunny	Formica	0
19	2006-08-31	afternoon	Cloudy	Formica	2
20	2006-08-16	morning	Rainy	Formica	0
20	2006-08-16	afternoon	Sunny	Formica	0
20	2006-08-17	morning	Sunny	Formica	1
20	2006-08-17	afternoon	Sunny	Formica	1
20	2006-08-18	morning	Cloudy	Formica	0
20	2006-08-18	afternoon	Sunny	Formica	2
20	2006-08-21	morning	Cloudy	Formica	3
20	2006-08-21	afternoon	Cloudy	Formica	1
20	2006-08-22	morning	Cloudy	Formica	0
20	2006-08-22	afternoon	Cloudy	Formica	2
20	2006-08-23	morning	Sunny	Formica	3
20	2006-08-23	afternoon	Sunny	Formica	0
20	2006-08-24	morning	Sunny	Formica	4
20	2006-08-24	afternoon	Rainy	Formica	1
20	2006-08-25	afternoon	Cloudy	Formica	3
20	2006-08-26	morning	Sunny	Formica	2
20	2006-08-26	afternoon	Cloudy	Formica	0
20	2006-08-27	morning	Cloudy	Formica	1
20	2006-08-27	afternoon	Cloudy	Formica	2
20	2006-08-28	morning	Cloudy	Formica	2
20	2006-08-29	morning	Rainy	Formica	1
20	2006-08-29	afternoon	Sunny	Formica	0
20	2006-08-30	morning	Sunny	Formica	1
20	2006-08-31	afternoon	Cloudy	Formica	0
1	2006-08-16	morning	Rainy	Tapinoma	3
1	2006-08-16	afternoon	Sunny	Tapinoma	1
1	2006-08-17	morning	Sunny	Tapinoma	4
1	2006-08-17	afternoon	Sunny	Tapinoma	0
1	2006-08-18	morning	Cloudy	Tapinoma	1
1	2006-08-18	afternoon	Sunny	Tapinoma	0
1	2006-08-21	morning	Cloudy	Tapinoma	0
1	2006-08-21	afternoon	Cloudy	Tapinoma	1
1	2006-08-22	morning	Cloudy	Tapinoma	0
1	2006-08-22	afternoon	Cloudy	Tapinoma	2
1	2006-08-23	morning	Sunny	Tapinoma	3
1	2006-08-23	afternoon	Sunny	Tapinoma	1
1	2006-08-24	morning	Sunny	Tapinoma	0
1	2006-08-24	afternoon	Rainy	Tapinoma	1
1	2006-08-25	afternoon	Cloudy	Tapinoma	1
1	2006-08-26	morning	Sunny	Tapinoma	3
1	2006-08-26	afternoon	Cloudy	Tapinoma	1
1	2006-08-27	morning	Cloudy	Tapinoma	0
1	2006-08-27	afternoon	Cloudy	Tapinoma	1
1	2006-08-28	morning	Cloudy	Tapinoma	2
1	2006-08-29	morning	Rainy	Tapinoma	1
1	2006-08-29	afternoon	Sunny	Tapinoma	0
1	2006-08-30	morning	Sunny	Tapinoma	0
1	2006-08-31	afternoon	Cloudy	Tapinoma	1
2	2006-08-16	morning	Rainy	Tapinoma	2
2	2006-08-16	afternoon	Sunny	Tapinoma	5
2	2006-08-17	morning	Sunny	Tapinoma	3
2	2006-08-17	afternoon	Sunny	Tapinoma	5
2	2006-08-18	morning	Cloudy	Tapinoma	3
2	2006-08-18	afternoon	Sunny	Tapinoma	2
2	2006-08-21	morning	Cloudy	Tapinoma	4
2	2006-08-21	afternoon	Cloudy	Tapinoma	2
2	2006-08-22	morning	Cloudy	Tapinoma	1
2	2006-08-22	afternoon	Cloudy	Tapinoma	3
2	2006-08-23	morning	Sunny	Tapinoma	0
2	2006-08-23	afternoon	Sunny	Tapinoma	1
2	2006-08-24	morning	Sunny	Tapinoma	2
2	2006-08-24	afternoon	Rainy	Tapinoma	5
2	2006-08-25	afternoon	Cloudy	Tapinoma	6
2	2006-08-26	morning	Sunny	Tapinoma	2
2	2006-08-26	afternoon	Cloudy	Tapinoma	1
2	2006-08-27	morning	Cloudy	Tapinoma	1
2	2006-08-27	afternoon	Cloudy	Tapinoma	0
2	2006-08-28	morning	Cloudy	Tapinoma	1
2	2006-08-29	morning	Rainy	Tapinoma	1
2	2006-08-29	afternoon	Sunny	Tapinoma	1
2	2006-08-30	morning	Sunny	Tapinoma	0
2	2006-08-31	afternoon	Cloudy	Tapinoma	2
3	2006-08-16	morning	Rainy	Tapinoma	0
3	2006-08-16	afternoon	Sunny	Tapinoma	3
3	2006-08-17	morning	Sunny	Tapinoma	3
3	2006-08-17	afternoon	Sunny	Tapinoma	4
3	2006-08-18	morning	Cloudy	Tapinoma	4
3	2006-08-18	afternoon	Sunny	Tapinoma	2
3	2006-08-21	morning	Cloudy	Tapinoma	5
3	2006-08-21	afternoon	Cloudy	Tapinoma	5
3	2006-08-22	morning	Cloudy	Tapinoma	1
3	2006-08-22	afternoon	Cloudy	Tapinoma	5
3	2006-08-23	morning	Sunny	Tapinoma	3
3	2006-08-23	afternoon	Sunny	Tapinoma	3
3	2006-08-24	morning	Sunny	Tapinoma	1
3	2006-08-24	afternoon	Rainy	Tapinoma	8
3	2006-08-25	afternoon	Cloudy	Tapinoma	5
3	2006-08-26	morning	Sunny	Tapinoma	4
3	2006-08-26	afternoon	Cloudy	Tapinoma	3
3	2006-08-27	morning	Cloudy	Tapinoma	1
3	2006-08-27	afternoon	Cloudy	Tapinoma	2
3	2006-08-28	morning	Cloudy	Tapinoma	4
3	2006-08-29	morning	Rainy	Tapinoma	0
3	2006-08-29	afternoon	Sunny	Tapinoma	2
3	2006-08-30	morning	Sunny	Tapinoma	2
3	2006-08-31	afternoon	Cloudy	Tapinoma	3
4	2006-08-16	morning	Rainy	Tapinoma	0
4	2006-08-16	afternoon	Sunny	Tapinoma	1
4	2006-08-17	morning	Sunny	Tapinoma	2
4	2006-08-17	afternoon	Sunny	Tapinoma	1
4	2006-08-18	morning	Cloudy	Tapinoma	1
4	2006-08-18	afternoon	Sunny	Tapinoma	0
4	2006-08-21	morning	Cloudy	Tapinoma	1
4	2006-08-21	afternoon	Cloudy	Tapinoma	0
4	2006-08-22	morning	Cloudy	Tapinoma	0
4	2006-08-22	afternoon	Cloudy	Tapinoma	2
4	2006-08-23	morning	Sunny	Tapinoma	1
4	2006-08-23	afternoon	Sunny	Tapinoma	0
4	2006-08-24	morning	Sunny	Tapinoma	0
4	2006-08-24	afternoon	Rainy	Tapinoma	2
4	2006-08-25	afternoon	Cloudy	Tapinoma	0
4	2006-08-26	morning	Sunny	Tapinoma	2
4	2006-08-26	afternoon	Cloudy	Tapinoma	3
4	2006-08-27	morning	Cloudy	Tapinoma	2
4	2006-08-27	afternoon	Cloudy	Tapinoma	0
4	2006-08-28	morning	Cloudy	Tapinoma	1
4	2006-08-29	morning	Rainy	Tapinoma	0
4	2006-08-29	afternoon	Sunny	Tapinoma	0
4	2006-08-30	morning	Sunny	Tapinoma	1
4	2006-08-31	afternoon	Cloudy	Tapinoma	0
5	2006-08-16	morning	Rainy	Tapinoma	0
5	2006-08-16	afternoon	Sunny	Tapinoma	2
5	2006-08-17	morning	Sunny	Tapinoma	1
5	2006-08-17	afternoon	Sunny	Tapinoma	1
5	2006-08-18	morning	Cloudy	Tapinoma	2
5	2006-08-18	afternoon	Sunny	Tapinoma	2
5	2006-08-21	morning	Cloudy	Tapinoma	3
5	2006-08-21	afternoon	Cloudy	Tapinoma	2
5	2006-08-22	morning	Cloudy	Tapinoma	0
5	2006-08-22	afternoon	Cloudy	Tapinoma	0
5	2006-08-23	morning	Sunny	Tapinoma	0
5	2006-08-23	afternoon	Sunny	Tapinoma	0
5	2006-08-24	morning	Sunny	Tapinoma	0
5	2006-08-24	afternoon	Rainy	Tapinoma	1
5	2006-08-25	afternoon	Cloudy	Tapinoma	1
5	2006-08-26	morning	Sunny	Tapinoma	0
5	2006-08-26	afternoon	Cloudy	Tapinoma	2
5	2006-08-27	morning	Cloudy	Tapinoma	1
5	2006-08-27	afternoon	Cloudy	Tapinoma	1
5	2006-08-28	morning	Cloudy	Tapinoma	3
5	2006-08-29	morning	Rainy	Tapinoma	0
5	2006-08-29	afternoon	Sunny	Tapinoma	3
5	2006-08-30	morning	Sunny	Tapinoma	0
5	2006-08-31	afternoon	Cloudy	Tapinoma	0
6	2006-08-16	morning	Rainy	Tapinoma	0
6	2006-08-16	afternoon	Sunny	Tapinoma	0
6	2006-08-17	morning	Sunny	Tapinoma	0
6	2006-08-17	afternoon	Sunny	Tapinoma	0
6	2006-08-18	morning	Cloudy	Tapinoma	0
6	2006-08-18	afternoon	Sunny	Tapinoma	0
6	2006-08-21	morning	Cloudy	Tapinoma	0
6	2006-08-21	afternoon	Cloudy	Tapinoma	0
6	2006-08-22	morning	Cloudy	Tapinoma	2
6	2006-08-22	afternoon	Cloudy	Tapinoma	0
6	2006-08-23	morning	Sunny	Tapinoma	0
6	2006-08-23	afternoon	Sunny	Tapinoma	0
6	2006-08-24	morning	Sunny	Tapinoma	0
6	2006-08-24	afternoon	Rainy	Tapinoma	0
6	2006-08-25	afternoon	Cloudy	Tapinoma	0
6	2006-08-26	morning	Sunny	Tapinoma	0
6	2006-08-26	afternoon	Cloudy	Tapinoma	0
6	2006-08-27	morning	Cloudy	Tapinoma	0
6	2006-08-27	afternoon	Cloudy	Tapinoma	0
6	2006-08-28	morning	Cloudy	Tapinoma	0
6	2006-08-29	morning	Rainy	Tapinoma	0
6	2006-08-29	afternoon	Sunny	Tapinoma	0
6	2006-08-30	morning	Sunny	Tapinoma	0
6	2006-08-31	afternoon	Cloudy	Tapinoma	0
7	2006-08-16	morning	Rainy	Tapinoma	0
7	2006-08-16	afternoon	Sunny	Tapinoma	0
7	2006-08-17	morning	Sunny	Tapinoma	0
7	2006-08-17	afternoon	Sunny	Tapinoma	0
7	2006-08-18	morning	Cloudy	Tapinoma	0
7	2006-08-18	afternoon	Sunny	Tapinoma	0
7	2006-08-21	morning	Cloudy	Tapinoma	0
7	2006-08-21	afternoon	Cloudy	Tapinoma	0
7	2006-08-22	morning	Cloudy	Tapinoma	2
7	2006-08-22	afternoon	Cloudy	Tapinoma	0
7	2006-08-23	morning	Sunny	Tapinoma	0
7	2006-08-23	afternoon	Sunny	Tapinoma	0
7	2006-08-24	morning	Sunny	Tapinoma	0
7	2006-08-24	afternoon	Rainy	Tapinoma	0
7	2006-08-25	afternoon	Cloudy	Tapinoma	0
7	2006-08-26	morning	Sunny	Tapinoma	0
7	2006-08-26	afternoon	Cloudy	Tapinoma	0
7	2006-08-27	morning	Cloudy	Tapinoma	0
7	2006-08-27	afternoon	Cloudy	Tapinoma	0
7	2006-08-28	morning	Cloudy	Tapinoma	0
7	2006-08-29	morning	Rainy	Tapinoma	1
7	2006-08-29	afternoon	Sunny	Tapinoma	0
7	2006-08-30	morning	Sunny	Tapinoma	0
7	2006-08-31	afternoon	Cloudy	Tapinoma	0
8	2006-08-16	morning	Rainy	Tapinoma	0
8	2006-08-16	afternoon	Sunny	Tapinoma	0
8	2006-08-17	morning	Sunny	Tapinoma	0
8	2006-08-17	afternoon	Sunny	Tapinoma	0
8	2006-08-18	morning	Cloudy	Tapinoma	0
8	2006-08-18	afternoon	Sunny	Tapinoma	0
8	2006-08-21	morning	Cloudy	Tapinoma	0
8	2006-08-21	afternoon	Cloudy	Tapinoma	0
8	2006-08-22	morning	Cloudy	Tapinoma	1
8	2006-08-22	afternoon	Cloudy	Tapinoma	5
8	2006-08-23	morning	Sunny	Tapinoma	1
8	2006-08-23	afternoon	Sunny	Tapinoma	4
8	2006-08-24	morning	Sunny	Tapinoma	0
8	2006-08-24	afternoon	Rainy	Tapinoma	3
8	2006-08-25	afternoon	Cloudy	Tapinoma	4
8	2006-08-26	morning	Sunny	Tapinoma	0
8	2006-08-26	afternoon	Cloudy	Tapinoma	1
8	2006-08-27	morning	Cloudy	Tapinoma	2
8	2006-08-27	afternoon	Cloudy	Tapinoma	3
8	2006-08-28	morning	Cloudy	Tapinoma	2
8	2006-08-29	morning	Rainy	Tapinoma	0
8	2006-08-29	afternoon	Sunny	Tapinoma	2
8	2006-08-30	morning	Sunny	Tapinoma	2
8	2006-08-31	afternoon	Cloudy	Tapinoma	1
9	2006-08-16	morning	Rainy	Tapinoma	0
9	2006-08-16	afternoon	Sunny	Tapinoma	0
9	2006-08-17	morning	Sunny	Tapinoma	0
9	2006-08-17	afternoon	Sunny	Tapinoma	0
9	2006-08-18	morning	Cloudy	Tapinoma	0
9	2006-08-18	afternoon	Sunny	Tapinoma	0
9	2006-08-21	morning	Cloudy	Tapinoma	0
9	2006-08-21	afternoon	Cloudy	Tapinoma	0
9	2006-08-22	morning	Cloudy	Tapinoma	2
9	2006-08-22	afternoon	Cloudy	Tapinoma	0
9	2006-08-23	morning	Sunny	Tapinoma	0
9	2006-08-23	afternoon	Sunny	Tapinoma	0
9	2006-08-24	morning	Sunny	Tapinoma	1
9	2006-08-24	afternoon	Rainy	Tapinoma	0
9	2006-08-25	afternoon	Cloudy	Tapinoma	0
9	2006-08-26	morning	Sunny	Tapinoma	0
9	2006-08-26	afternoon	Cloudy	Tapinoma	1
9	2006-08-27	morning	Cloudy	Tapinoma	0
9	2006-08-27	afternoon	Cloudy	Tapinoma	0
9	2006-08-28	morning	Cloudy	Tapinoma	0
9	2006-08-29	morning	Rainy	Tapinoma	0
9	2006-08-29	afternoon	Sunny	Tapinoma	0
9	2006-08-30	morning	Sunny	Tapinoma	0
9	2006-08-31	afternoon	Cloudy	Tapinoma	0
10	2006-08-16	morning	Rainy	Tapinoma	1
10	2006-08-16	afternoon	Sunny	Tapinoma	0
10	2006-08-17	morning	Sunny	Tapinoma	0
10	2006-08-17	afternoon	Sunny	Tapinoma	0
10	2006-08-18	morning	Cloudy	Tapinoma	0
10	2006-08-18	afternoon	Sunny	Tapinoma	0
10	2006-08-21	morning	Cloudy	Tapinoma	1
10	2006-08-21	afternoon	Cloudy	Tapinoma	0
10	2006-08-22	morning	Cloudy	Tapinoma	1
10	2006-08-22	afternoon	Cloudy	Tapinoma	0
10	2006-08-23	morning	Sunny	Tapinoma	0
10	2006-08-23	afternoon	Sunny	Tapinoma	0
10	2006-08-24	morning	Sunny	Tapinoma	0
10	2006-08-24	afternoon	Rainy	Tapinoma	0
10	2006-08-25	afternoon	Cloudy	Tapinoma	0
10	2006-08-26	morning	Sunny	Tapinoma	0
10	2006-08-26	afternoon	Cloudy	Tapinoma	0
10	2006-08-27	morning	Cloudy	Tapinoma	0
10	2006-08-27	afternoon	Cloudy	Tapinoma	0
10	2006-08-28	morning	Cloudy	Tapinoma	2
10	2006-08-29	morning	Rainy	Tapinoma	0
10	2006-08-29	afternoon	Sunny	Tapinoma	1
10	2006-08-30	morning	Sunny	Tapinoma	0
10	2006-08-31	afternoon	Cloudy	Tapinoma	0
11	2006-08-16	morning	Rainy	Tapinoma	0
11	2006-08-16	afternoon	Sunny	Tapinoma	1
11	2006-08-17	morning	Sunny	Tapinoma	0
11	2006-08-17	afternoon	Sunny	Tapinoma	1
11	2006-08-18	morning	Cloudy	Tapinoma	0
11	2006-08-18	afternoon	Sunny	Tapinoma	0
11	2006-08-21	morning	Cloudy	Tapinoma	0
11	2006-08-21	afternoon	Cloudy	Tapinoma	0
11	2006-08-22	morning	Cloudy	Tapinoma	3
11	2006-08-22	afternoon	Cloudy	Tapinoma	0
11	2006-08-23	morning	Sunny	Tapinoma	0
11	2006-08-23	afternoon	Sunny	Tapinoma	0
11	2006-08-24	morning	Sunny	Tapinoma	1
11	2006-08-24	afternoon	Rainy	Tapinoma	0
11	2006-08-25	afternoon	Cloudy	Tapinoma	0
11	2006-08-26	morning	Sunny	Tapinoma	0
11	2006-08-26	afternoon	Cloudy	Tapinoma	0
11	2006-08-27	morning	Cloudy	Tapinoma	0
11	2006-08-27	afternoon	Cloudy	Tapinoma	0
11	2006-08-28	morning	Cloudy	Tapinoma	2
11	2006-08-29	morning	Rainy	Tapinoma	0
11	2006-08-29	afternoon	Sunny	Tapinoma	0
11	2006-08-30	morning	Sunny	Tapinoma	1
11	2006-08-31	afternoon	Cloudy	Tapinoma	0
12	2006-08-16	morning	Rainy	Tapinoma	0
12	2006-08-16	afternoon	Sunny	Tapinoma	0
12	2006-08-17	morning	Sunny	Tapinoma	0
12	2006-08-17	afternoon	Sunny	Tapinoma	0
12	2006-08-18	morning	Cloudy	Tapinoma	0
12	2006-08-18	afternoon	Sunny	Tapinoma	0
12	2006-08-21	morning	Cloudy	Tapinoma	0
12	2006-08-21	afternoon	Cloudy	Tapinoma	0
12	2006-08-22	morning	Cloudy	Tapinoma	1
12	2006-08-22	afternoon	Cloudy	Tapinoma	0
12	2006-08-23	morning	Sunny	Tapinoma	4
12	2006-08-23	afternoon	Sunny	Tapinoma	0
12	2006-08-24	morning	Sunny	Tapinoma	0
12	2006-08-24	afternoon	Rainy	Tapinoma	0
12	2006-08-25	afternoon	Cloudy	Tapinoma	0
12	2006-08-26	morning	Sunny	Tapinoma	0
12	2006-08-26	afternoon	Cloudy	Tapinoma	0
12	2006-08-27	morning	Cloudy	Tapinoma	0
12	2006-08-27	afternoon	Cloudy	Tapinoma	0
12	2006-08-28	morning	Cloudy	Tapinoma	0
12	2006-08-29	morning	Rainy	Tapinoma	0
12	2006-08-29	afternoon	Sunny	Tapinoma	0
12	2006-08-30	morning	Sunny	Tapinoma	0
12	2006-08-31	afternoon	Cloudy	Tapinoma	0
13	2006-08-16	morning	Rainy	Tapinoma	0
13	2006-08-16	afternoon	Sunny	Tapinoma	0
13	2006-08-17	morning	Sunny	Tapinoma	0
13	2006-08-17	afternoon	Sunny	Tapinoma	0
13	2006-08-18	morning	Cloudy	Tapinoma	0
13	2006-08-18	afternoon	Sunny	Tapinoma	0
13	2006-08-21	morning	Cloudy	Tapinoma	0
13	2006-08-21	afternoon	Cloudy	Tapinoma	0
13	2006-08-22	morning	Cloudy	Tapinoma	0
13	2006-08-22	afternoon	Cloudy	Tapinoma	0
13	2006-08-23	morning	Sunny	Tapinoma	0
13	2006-08-23	afternoon	Sunny	Tapinoma	0
13	2006-08-24	morning	Sunny	Tapinoma	0
13	2006-08-24	afternoon	Rainy	Tapinoma	0
13	2006-08-25	afternoon	Cloudy	Tapinoma	0
13	2006-08-26	morning	Sunny	Tapinoma	0
13	2006-08-26	afternoon	Cloudy	Tapinoma	0
13	2006-08-27	morning	Cloudy	Tapinoma	1
13	2006-08-27	afternoon	Cloudy	Tapinoma	0
13	2006-08-28	morning	Cloudy	Tapinoma	0
13	2006-08-29	morning	Rainy	Tapinoma	0
13	2006-08-29	afternoon	Sunny	Tapinoma	0
13	2006-08-30	morning	Sunny	Tapinoma	0
13	2006-08-31	afternoon	Cloudy	Tapinoma	0
14	2006-08-16	morning	Rainy	Tapinoma	0
14	2006-08-16	afternoon	Sunny	Tapinoma	0
14	2006-08-17	morning	Sunny	Tapinoma	0
14	2006-08-17	afternoon	Sunny	Tapinoma	1
14	2006-08-18	morning	Cloudy	Tapinoma	0
14	2006-08-18	afternoon	Sunny	Tapinoma	0
14	2006-08-21	morning	Cloudy	Tapinoma	0
14	2006-08-21	afternoon	Cloudy	Tapinoma	1
14	2006-08-22	morning	Cloudy	Tapinoma	2
14	2006-08-22	afternoon	Cloudy	Tapinoma	0
14	2006-08-23	morning	Sunny	Tapinoma	0
14	2006-08-23	afternoon	Sunny	Tapinoma	0
14	2006-08-24	morning	Sunny	Tapinoma	0
14	2006-08-24	afternoon	Rainy	Tapinoma	0
14	2006-08-25	afternoon	Cloudy	Tapinoma	0
14	2006-08-26	morning	Sunny	Tapinoma	0
14	2006-08-26	afternoon	Cloudy	Tapinoma	0
14	2006-08-27	morning	Cloudy	Tapinoma	0
14	2006-08-27	afternoon	Cloudy	Tapinoma	0
14	2006-08-28	morning	Cloudy	Tapinoma	1
14	2006-08-29	morning	Rainy	Tapinoma	0
14	2006-08-29	afternoon	Sunny	Tapinoma	0
14	2006-08-30	morning	Sunny	Tapinoma	0
14	2006-08-31	afternoon	Cloudy	Tapinoma	0
15	2006-08-16	morning	Rainy	Tapinoma	3
15	2006-08-16	afternoon	Sunny	Tapinoma	6
15	2006-08-17	morning	Sunny	Tapinoma	6
15	2006-08-17	afternoon	Sunny	Tapinoma	5
15	2006-08-18	morning	Cloudy	Tapinoma	9
15	2006-08-18	afternoon	Sunny	Tapinoma	11
15	2006-08-21	morning	Cloudy	Tapinoma	3
15	2006-08-21	afternoon	Cloudy	Tapinoma	2
15	2006-08-22	morning	Cloudy	Tapinoma	0
15	2006-08-22	afternoon	Cloudy	Tapinoma	3
15	2006-08-23	morning	Sunny	Tapinoma	0
15	2006-08-23	afternoon	Sunny	Tapinoma	1
15	2006-08-24	morning	Sunny	Tapinoma	3
15	2006-08-24	afternoon	Rainy	Tapinoma	6
15	2006-08-25	afternoon	Cloudy	Tapinoma	3
15	2006-08-26	morning	Sunny	Tapinoma	2
15	2006-08-26	afternoon	Cloudy	Tapinoma	6
15	2006-08-27	morning	Cloudy	Tapinoma	4
15	2006-08-27	afternoon	Cloudy	Tapinoma	0
15	2006-08-28	morning	Cloudy	Tapinoma	1
15	2006-08-29	morning	Rainy	Tapinoma	2
15	2006-08-29	afternoon	Sunny	Tapinoma	2
15	2006-08-30	morning	Sunny	Tapinoma	1
15	2006-08-31	afternoon	Cloudy	Tapinoma	1
16	2006-08-16	morning	Rainy	Tapinoma	0
16	2006-08-16	afternoon	Sunny	Tapinoma	1
16	2006-08-17	morning	Sunny	Tapinoma	3
16	2006-08-17	afternoon	Sunny	Tapinoma	3
16	2006-08-18	morning	Cloudy	Tapinoma	2
16	2006-08-18	afternoon	Sunny	Tapinoma	1
16	2006-08-21	morning	Cloudy	Tapinoma	1
16	2006-08-21	afternoon	Cloudy	Tapinoma	6
16	2006-08-22	morning	Cloudy	Tapinoma	0
16	2006-08-22	afternoon	Cloudy	Tapinoma	8
16	2006-08-23	morning	Sunny	Tapinoma	2
16	2006-08-23	afternoon	Sunny	Tapinoma	4
16	2006-08-24	morning	Sunny	Tapinoma	0
16	2006-08-24	afternoon	Rainy	Tapinoma	2
16	2006-08-25	afternoon	Cloudy	Tapinoma	2
16	2006-08-26	morning	Sunny	Tapinoma	3
16	2006-08-26	afternoon	Cloudy	Tapinoma	5
16	2006-08-27	morning	Cloudy	Tapinoma	4
16	2006-08-27	afternoon	Cloudy	Tapinoma	1
16	2006-08-28	morning	Cloudy	Tapinoma	3
16	2006-08-29	morning	Rainy	Tapinoma	2
16	2006-08-29	afternoon	Sunny	Tapinoma	3
16	2006-08-30	morning	Sunny	Tapinoma	2
16	2006-08-31	afternoon	Cloudy	Tapinoma	7
17	2006-08-16	morning	Rainy	Tapinoma	0
17	2006-08-16	afternoon	Sunny	Tapinoma	1
17	2006-08-17	morning	Sunny	Tapinoma	1
17	2006-08-17	afternoon	Sunny	Tapinoma	0
17	2006-08-18	morning	Cloudy	Tapinoma	0
17	2006-08-18	afternoon	Sunny	Tapinoma	0
17	2006-08-21	morning	Cloudy	Tapinoma	2
17	2006-08-21	afternoon	Cloudy	Tapinoma	0
17	2006-08-22	morning	Cloudy	Tapinoma	0
17	2006-08-22	afternoon	Cloudy	Tapinoma	0
17	2006-08-23	morning	Sunny	Tapinoma	0
17	2006-08-23	afternoon	Sunny	Tapinoma	1
17	2006-08-24	morning	Sunny	Tapinoma	0
17	2006-08-24	afternoon	Rainy	Tapinoma	0
17	2006-08-25	afternoon	Cloudy	Tapinoma	1
17	2006-08-26	morning	Sunny	Tapinoma	0
17	2006-08-26	afternoon	Cloudy	Tapinoma	0
17	2006-08-27	morning	Cloudy	Tapinoma	0
17	2006-08-27	afternoon	Cloudy	Tapinoma	1
17	2006-08-28	morning	Cloudy	Tapinoma	0
17	2006-08-29	morning	Rainy	Tapinoma	1
17	2006-08-29	afternoon	Sunny	Tapinoma	0
17	2006-08-30	morning	Sunny	Tapinoma	0
17	2006-08-31	afternoon	Cloudy	Tapinoma	0
18	2006-08-16	morning	Rainy	Tapinoma	0
18	2006-08-16	afternoon	Sunny	Tapinoma	0
18	2006-08-17	morning	Sunny	Tapinoma	0
18	2006-08-17	afternoon	Sunny	Tapinoma	0
18	2006-08-18	morning	Cloudy	Tapinoma	0
18	2006-08-18	afternoon	Sunny	Tapinoma	0
18	2006-08-21	morning	Cloudy	Tapinoma	1
18	2006-08-21	afternoon	Cloudy	Tapinoma	1
18	2006-08-22	morning	Cloudy	Tapinoma	0
18	2006-08-22	afternoon	Cloudy	Tapinoma	1
18	2006-08-23	morning	Sunny	Tapinoma	0
18	2006-08-23	afternoon	Sunny	Tapinoma	0
18	2006-08-24	morning	Sunny	Tapinoma	1
18	2006-08-24	afternoon	Rainy	Tapinoma	1
18	2006-08-25	afternoon	Cloudy	Tapinoma	1
18	2006-08-26	morning	Sunny	Tapinoma	0
18	2006-08-26	afternoon	Cloudy	Tapinoma	1
18	2006-08-27	morning	Cloudy	Tapinoma	1
18	2006-08-27	afternoon	Cloudy	Tapinoma	0
18	2006-08-28	morning	Cloudy	Tapinoma	1
18	2006-08-29	morning	Rainy	Tapinoma	0
18	2006-08-29	afternoon	Sunny	Tapinoma	0
18	2006-08-30	morning	Sunny	Tapinoma	0
18	2006-08-31	afternoon	Cloudy	Tapinoma	0
19	2006-08-16	morning	Rainy	Tapinoma	0
19	2006-08-16	afternoon	Sunny	Tapinoma	0
19	2006-08-17	morning	Sunny	Tapinoma	0
19	2006-08-17	afternoon	Sunny	Tapinoma	0
19	2006-08-18	morning	Cloudy	Tapinoma	0
19	2006-08-18	afternoon	Sunny	Tapinoma	1
19	2006-08-21	morning	Cloudy	Tapinoma	0
19	2006-08-21	afternoon	Cloudy	Tapinoma	2
19	2006-08-22	morning	Cloudy	Tapinoma	0
19	2006-08-22	afternoon	Cloudy	Tapinoma	1
19	2006-08-23	morning	Sunny	Tapinoma	0
19	2006-08-23	afternoon	Sunny	Tapinoma	0
19	2006-08-24	morning	Sunny	Tapinoma	1
19	2006-08-24	afternoon	Rainy	Tapinoma	0
19	2006-08-25	afternoon	Cloudy	Tapinoma	0
19	2006-08-26	morning	Sunny	Tapinoma	1
19	2006-08-26	afternoon	Cloudy	Tapinoma	2
19	2006-08-27	morning	Cloudy	Tapinoma	0
19	2006-08-27	afternoon	Cloudy	Tapinoma	1
19	2006-08-28	morning	Cloudy	Tapinoma	0
19	2006-08-29	morning	Rainy	Tapinoma	1
19	2006-08-29	afternoon	Sunny	Tapinoma	0
19	2006-08-30	morning	Sunny	Tapinoma	0
19	2006-08-31	afternoon	Cloudy	Tapinoma	0
20	2006-08-16	morning	Rainy	Tapinoma	1
20	2006-08-16	afternoon	Sunny	Tapinoma	4
20	2006-08-17	morning	Sunny	Tapinoma	2
20	2006-08-17	afternoon	Sunny	Tapinoma	1
20	2006-08-18	morning	Cloudy	Tapinoma	2
20	2006-08-18	afternoon	Sunny	Tapinoma	4
20	2006-08-21	morning	Cloudy	Tapinoma	0
20	2006-08-21	afternoon	Cloudy	Tapinoma	2
20	2006-08-22	morning	Cloudy	Tapinoma	0
20	2006-08-22	afternoon	Cloudy	Tapinoma	1
20	2006-08-23	morning	Sunny	Tapinoma	1
20	2006-08-23	afternoon	Sunny	Tapinoma	0
20	2006-08-24	morning	Sunny	Tapinoma	1
20	2006-08-24	afternoon	Rainy	Tapinoma	1
20	2006-08-25	afternoon	Cloudy	Tapinoma	1
20	2006-08-26	morning	Sunny	Tapinoma	1
20	2006-08-26	afternoon	Cloudy	Tapinoma	3
20	2006-08-27	morning	Cloudy	Tapinoma	1
20	2006-08-27	afternoon	Cloudy	Tapinoma	1
20	2006-08-28	morning	Cloudy	Tapinoma	0
20	2006-08-29	morning	Rainy	Tapinoma	1
20	2006-08-29	afternoon	Sunny	Tapinoma	2
20	2006-08-30	morning	Sunny	Tapinoma	1
20	2006-08-31	afternoon	Cloudy	Tapinoma	2
1	2006-08-16	morning	Rainy	Winged	0
1	2006-08-16	afternoon	Sunny	Winged	4
1	2006-08-17	morning	Sunny	Winged	1
1	2006-08-17	afternoon	Sunny	Winged	8
1	2006-08-18	morning	Cloudy	Winged	1
1	2006-08-18	afternoon	Sunny	Winged	3
1	2006-08-21	morning	Cloudy	Winged	1
1	2006-08-21	afternoon	Cloudy	Winged	4
1	2006-08-22	morning	Cloudy	Winged	1
1	2006-08-22	afternoon	Cloudy	Winged	3
1	2006-08-23	morning	Sunny	Winged	0
1	2006-08-23	afternoon	Sunny	Winged	0
1	2006-08-24	morning	Sunny	Winged	2
1	2006-08-24	afternoon	Rainy	Winged	2
1	2006-08-25	afternoon	Cloudy	Winged	1
1	2006-08-26	morning	Sunny	Winged	1
1	2006-08-26	afternoon	Cloudy	Winged	3
1	2006-08-27	morning	Cloudy	Winged	3
1	2006-08-27	afternoon	Cloudy	Winged	1
1	2006-08-28	morning	Cloudy	Winged	2
1	2006-08-29	morning	Rainy	Winged	0
1	2006-08-29	afternoon	Sunny	Winged	0
1	2006-08-30	morning	Sunny	Winged	1
1	2006-08-31	afternoon	Cloudy	Winged	4
2	2006-08-16	morning	Rainy	Winged	0
2	2006-08-16	afternoon	Sunny	Winged	1
2	2006-08-17	morning	Sunny	Winged	1
2	2006-08-17	afternoon	Sunny	Winged	0
2	2006-08-18	morning	Cloudy	Winged	1
2	2006-08-18	afternoon	Sunny	Winged	0
2	2006-08-21	morning	Cloudy	Winged	0
2	2006-08-21	afternoon	Cloudy	Winged	2
2	2006-08-22	morning	Cloudy	Winged	0
2	2006-08-22	afternoon	Cloudy	Winged	2
2	2006-08-23	morning	Sunny	Winged	2
2	2006-08-23	afternoon	Sunny	Winged	4
2	2006-08-24	morning	Sunny	Winged	1
2	2006-08-24	afternoon	Rainy	Winged	0
2	2006-08-25	afternoon	Cloudy	Winged	2
2	2006-08-26	morning	Sunny	Winged	2
2	2006-08-26	afternoon	Cloudy	Winged	1
2	2006-08-27	morning	Cloudy	Winged	1
2	2006-08-27	afternoon	Cloudy	Winged	1
2	2006-08-28	morning	Cloudy	Winged	0
2	2006-08-29	morning	Rainy	Winged	0
2	2006-08-29	afternoon	Sunny	Winged	1
2	2006-08-30	morning	Sunny	Winged	0
2	2006-08-31	afternoon	Cloudy	Winged	1
3	2006-08-16	morning	Rainy	Winged	0
3	2006-08-16	afternoon	Sunny	Winged	1
3	2006-08-17	morning	Sunny	Winged	2
3	2006-08-17	afternoon	Sunny	Winged	1
3	2006-08-18	morning	Cloudy	Winged	0
3	2006-08-18	afternoon	Sunny	Winged	2
3	2006-08-21	morning	Cloudy	Winged	0
3	2006-08-21	afternoon	Cloudy	Winged	1
3	2006-08-22	morning	Cloudy	Winged	1
3	2006-08-22	afternoon	Cloudy	Winged	3
3	2006-08-23	morning	Sunny	Winged	3
3	2006-08-23	afternoon	Sunny	Winged	7
3	2006-08-24	morning	Sunny	Winged	2
3	2006-08-24	afternoon	Rainy	Winged	0
3	2006-08-25	afternoon	Cloudy	Winged	3
3	2006-08-26	morning	Sunny	Winged	5
3	2006-08-26	afternoon	Cloudy	Winged	3
3	2006-08-27	morning	Cloudy	Winged	2
3	2006-08-27	afternoon	Cloudy	Winged	0
3	2006-08-28	morning	Cloudy	Winged	1
3	2006-08-29	morning	Rainy	Winged	0
3	2006-08-29	afternoon	Sunny	Winged	2
3	2006-08-30	morning	Sunny	Winged	2
3	2006-08-31	afternoon	Cloudy	Winged	2
4	2006-08-16	morning	Rainy	Winged	0
4	2006-08-16	afternoon	Sunny	Winged	3
4	2006-08-17	morning	Sunny	Winged	2
4	2006-08-17	afternoon	Sunny	Winged	1
4	2006-08-18	morning	Cloudy	Winged	0
4	2006-08-18	afternoon	Sunny	Winged	3
4	2006-08-21	morning	Cloudy	Winged	0
4	2006-08-21	afternoon	Cloudy	Winged	1
4	2006-08-22	morning	Cloudy	Winged	1
4	2006-08-22	afternoon	Cloudy	Winged	0
4	2006-08-23	morning	Sunny	Winged	2
4	2006-08-23	afternoon	Sunny	Winged	7
4	2006-08-24	morning	Sunny	Winged	5
4	2006-08-24	afternoon	Rainy	Winged	0
4	2006-08-25	afternoon	Cloudy	Winged	2
4	2006-08-26	morning	Sunny	Winged	4
4	2006-08-26	afternoon	Cloudy	Winged	0
4	2006-08-27	morning	Cloudy	Winged	2
4	2006-08-27	afternoon	Cloudy	Winged	1
4	2006-08-28	morning	Cloudy	Winged	4
4	2006-08-29	morning	Rainy	Winged	2
4	2006-08-29	afternoon	Sunny	Winged	4
4	2006-08-30	morning	Sunny	Winged	3
4	2006-08-31	afternoon	Cloudy	Winged	3
5	2006-08-16	morning	Rainy	Winged	0
5	2006-08-16	afternoon	Sunny	Winged	0
5	2006-08-17	morning	Sunny	Winged	2
5	2006-08-17	afternoon	Sunny	Winged	3
5	2006-08-18	morning	Cloudy	Winged	1
5	2006-08-18	afternoon	Sunny	Winged	1
5	2006-08-21	morning	Cloudy	Winged	1
5	2006-08-21	afternoon	Cloudy	Winged	0
5	2006-08-22	morning	Cloudy	Winged	0
5	2006-08-22	afternoon	Cloudy	Winged	1
5	2006-08-23	morning	Sunny	Winged	2
5	2006-08-23	afternoon	Sunny	Winged	4
5	2006-08-24	morning	Sunny	Winged	4
5	2006-08-24	afternoon	Rainy	Winged	2
5	2006-08-25	afternoon	Cloudy	Winged	1
5	2006-08-26	morning	Sunny	Winged	4
5	2006-08-26	afternoon	Cloudy	Winged	2
5	2006-08-27	morning	Cloudy	Winged	2
5	2006-08-27	afternoon	Cloudy	Winged	1
5	2006-08-28	morning	Cloudy	Winged	4
5	2006-08-29	morning	Rainy	Winged	0
5	2006-08-29	afternoon	Sunny	Winged	3
5	2006-08-30	morning	Sunny	Winged	3
5	2006-08-31	afternoon	Cloudy	Winged	2
6	2006-08-16	morning	Rainy	Winged	0
6	2006-08-16	afternoon	Sunny	Winged	1
6	2006-08-17	morning	Sunny	Winged	0
6	2006-08-17	afternoon	Sunny	Winged	0
6	2006-08-18	morning	Cloudy	Winged	0
6	2006-08-18	afternoon	Sunny	Winged	0
6	2006-08-21	morning	Cloudy	Winged	3
6	2006-08-21	afternoon	Cloudy	Winged	2
6	2006-08-22	morning	Cloudy	Winged	1
6	2006-08-22	afternoon	Cloudy	Winged	2
6	2006-08-23	morning	Sunny	Winged	4
6	2006-08-23	afternoon	Sunny	Winged	3
6	2006-08-24	morning	Sunny	Winged	1
6	2006-08-24	afternoon	Rainy	Winged	0
6	2006-08-25	afternoon	Cloudy	Winged	1
6	2006-08-26	morning	Sunny	Winged	0
6	2006-08-26	afternoon	Cloudy	Winged	0
6	2006-08-27	morning	Cloudy	Winged	0
6	2006-08-27	afternoon	Cloudy	Winged	0
6	2006-08-28	morning	Cloudy	Winged	1
6	2006-08-29	morning	Rainy	Winged	0
6	2006-08-29	afternoon	Sunny	Winged	1
6	2006-08-30	morning	Sunny	Winged	0
6	2006-08-31	afternoon	Cloudy	Winged	1
7	2006-08-16	morning	Rainy	Winged	0
7	2006-08-16	afternoon	Sunny	Winged	0
7	2006-08-17	morning	Sunny	Winged	0
7	2006-08-17	afternoon	Sunny	Winged	4
7	2006-08-18	morning	Cloudy	Winged	0
7	2006-08-18	afternoon	Sunny	Winged	0
7	2006-08-21	morning	Cloudy	Winged	1
7	2006-08-21	afternoon	Cloudy	Winged	0
7	2006-08-22	morning	Cloudy	Winged	1
7	2006-08-22	afternoon	Cloudy	Winged	0
7	2006-08-23	morning	Sunny	Winged	0
7	2006-08-23	afternoon	Sunny	Winged	2
7	2006-08-24	morning	Sunny	Winged	2
7	2006-08-24	afternoon	Rainy	Winged	1
7	2006-08-25	afternoon	Cloudy	Winged	2
7	2006-08-26	morning	Sunny	Winged	0
7	2006-08-26	afternoon	Cloudy	Winged	1
7	2006-08-27	morning	Cloudy	Winged	1
7	2006-08-27	afternoon	Cloudy	Winged	1
7	2006-08-28	morning	Cloudy	Winged	0
7	2006-08-29	morning	Rainy	Winged	0
7	2006-08-29	afternoon	Sunny	Winged	2
7	2006-08-30	morning	Sunny	Winged	2
7	2006-08-31	afternoon	Cloudy	Winged	1
8	2006-08-16	morning	Rainy	Winged	0
8	2006-08-16	afternoon	Sunny	Winged	0
8	2006-08-17	morning	Sunny	Winged	1
8	2006-08-17	afternoon	Sunny	Winged	0
8	2006-08-18	morning	Cloudy	Winged	0
8	2006-08-18	afternoon	Sunny	Winged	0
8	2006-08-21	morning	Cloudy	Winged	1
8	2006-08-21	afternoon	Cloudy	Winged	1
8	2006-08-22	morning	Cloudy	Winged	1
8	2006-08-22	afternoon	Cloudy	Winged	1
8	2006-08-23	morning	Sunny	Winged	2
8	2006-08-23	afternoon	Sunny	Winged	5
8	2006-08-24	morning	Sunny	Winged	3
8	2006-08-24	afternoon	Rainy	Winged	1
8	2006-08-25	afternoon	Cloudy	Winged	2
8	2006-08-26	morning	Sunny	Winged	2
8	2006-08-26	afternoon	Cloudy	Winged	0
8	2006-08-27	morning	Cloudy	Winged	1
8	2006-08-27	afternoon	Cloudy	Winged	0
8	2006-08-28	morning	Cloudy	Winged	0
8	2006-08-29	morning	Rainy	Winged	0
8	2006-08-29	afternoon	Sunny	Winged	0
8	2006-08-30	morning	Sunny	Winged	0
8	2006-08-31	afternoon	Cloudy	Winged	1
9	2006-08-16	morning	Rainy	Winged	0
9	2006-08-16	afternoon	Sunny	Winged	0
9	2006-08-17	morning	Sunny	Winged	0
9	2006-08-17	afternoon	Sunny	Winged	0
9	2006-08-18	morning	Cloudy	Winged	1
9	2006-08-18	afternoon	Sunny	Winged	1
9	2006-08-21	morning	Cloudy	Winged	2
9	2006-08-21	afternoon	Cloudy	Winged	1
9	2006-08-22	morning	Cloudy	Winged	0
9	2006-08-22	afternoon	Cloudy	Winged	4
9	2006-08-23	morning	Sunny	Winged	4
9	2006-08-23	afternoon	Sunny	Winged	3
9	2006-08-24	morning	Sunny	Winged	4
9	2006-08-24	afternoon	Rainy	Winged	1
9	2006-08-25	afternoon	Cloudy	Winged	4
9	2006-08-26	morning	Sunny	Winged	3
9	2006-08-26	afternoon	Cloudy	Winged	2
9	2006-08-27	morning	Cloudy	Winged	2
9	2006-08-27	afternoon	Cloudy	Winged	0
9	2006-08-28	morning	Cloudy	Winged	1
9	2006-08-29	morning	Rainy	Winged	0
9	2006-08-29	afternoon	Sunny	Winged	1
9	2006-08-30	morning	Sunny	Winged	3
9	2006-08-31	afternoon	Cloudy	Winged	3
10	2006-08-16	morning	Rainy	Winged	0
10	2006-08-16	afternoon	Sunny	Winged	1
10	2006-08-17	morning	Sunny	Winged	0
10	2006-08-17	afternoon	Sunny	Winged	1
10	2006-08-18	morning	Cloudy	Winged	1
10	2006-08-18	afternoon	Sunny	Winged	1
10	2006-08-21	morning	Cloudy	Winged	4
10	2006-08-21	afternoon	Cloudy	Winged	0
10	2006-08-22	morning	Cloudy	Winged	0
10	2006-08-22	afternoon	Cloudy	Winged	1
10	2006-08-23	morning	Sunny	Winged	1
10	2006-08-23	afternoon	Sunny	Winged	0
10	2006-08-24	morning	Sunny	Winged	0
10	2006-08-24	afternoon	Rainy	Winged	0
10	2006-08-25	afternoon	Cloudy	Winged	2
10	2006-08-26	morning	Sunny	Winged	1
10	2006-08-26	afternoon	Cloudy	Winged	0
10	2006-08-27	morning	Cloudy	Winged	1
10	2006-08-27	afternoon	Cloudy	Winged	0
10	2006-08-28	morning	Cloudy	Winged	0
10	2006-08-29	morning	Rainy	Winged	0
10	2006-08-29	afternoon	Sunny	Winged	0
10	2006-08-30	morning	Sunny	Winged	0
10	2006-08-31	afternoon	Cloudy	Winged	2
11	2006-08-16	morning	Rainy	Winged	0
11	2006-08-16	afternoon	Sunny	Winged	0
11	2006-08-17	morning	Sunny	Winged	0
11	2006-08-17	afternoon	Sunny	Winged	0
11	2006-08-18	morning	Cloudy	Winged	2
11	2006-08-18	afternoon	Sunny	Winged	1
11	2006-08-21	morning	Cloudy	Winged	1
11	2006-08-21	afternoon	Cloudy	Winged	1
11	2006-08-22	morning	Cloudy	Winged	0
11	2006-08-22	afternoon	Cloudy	Winged	3
11	2006-08-23	morning	Sunny	Winged	3
11	2006-08-23	afternoon	Sunny	Winged	1
11	2006-08-24	morning	Sunny	Winged	0
11	2006-08-24	afternoon	Rainy	Winged	0
11	2006-08-25	afternoon	Cloudy	Winged	0
11	2006-08-26	morning	Sunny	Winged	4
11	2006-08-26	afternoon	Cloudy	Winged	1
11	2006-08-27	morning	Cloudy	Winged	0
11	2006-08-27	afternoon	Cloudy	Winged	0
11	2006-08-28	morning	Cloudy	Winged	0
11	2006-08-29	morning	Rainy	Winged	0
11	2006-08-29	afternoon	Sunny	Winged	0
11	2006-08-30	morning	Sunny	Winged	0
11	2006-08-31	afternoon	Cloudy	Winged	1
12	2006-08-16	morning	Rainy	Winged	0
12	2006-08-16	afternoon	Sunny	Winged	0
12	2006-08-17	morning	Sunny	Winged	2
12	2006-08-17	afternoon	Sunny	Winged	1
12	2006-08-18	morning	Cloudy	Winged	1
12	2006-08-18	afternoon	Sunny	Winged	0
12	2006-08-21	morning	Cloudy	Winged	1
12	2006-08-21	afternoon	Cloudy	Winged	1
12	2006-08-22	morning	Cloudy	Winged	0
12	2006-08-22	afternoon	Cloudy	Winged	2
12	2006-08-23	morning	Sunny	Winged	2
12	2006-08-23	afternoon	Sunny	Winged	0
12	2006-08-24	morning	Sunny	Winged	1
12	2006-08-24	afternoon	Rainy	Winged	0
12	2006-08-25	afternoon	Cloudy	Winged	1
12	2006-08-26	morning	Sunny	Winged	2
12	2006-08-26	afternoon	Cloudy	Winged	1
12	2006-08-27	morning	Cloudy	Winged	0
12	2006-08-27	afternoon	Cloudy	Winged	0
12	2006-08-28	morning	Cloudy	Winged	0
12	2006-08-29	morning	Rainy	Winged	0
12	2006-08-29	afternoon	Sunny	Winged	0
12	2006-08-30	morning	Sunny	Winged	0
12	2006-08-31	afternoon	Cloudy	Winged	1
13	2006-08-16	morning	Rainy	Winged	0
13	2006-08-16	afternoon	Sunny	Winged	0
13	2006-08-17	morning	Sunny	Winged	1
13	2006-08-17	afternoon	Sunny	Winged	1
13	2006-08-18	morning	Cloudy	Winged	0
13	2006-08-18	afternoon	Sunny	Winged	0
13	2006-08-21	morning	Cloudy	Winged	1
13	2006-08-21	afternoon	Cloudy	Winged	2
13	2006-08-22	morning	Cloudy	Winged	0
13	2006-08-22	afternoon	Cloudy	Winged	0
13	2006-08-23	morning	Sunny	Winged	0
13	2006-08-23	afternoon	Sunny	Winged	4
13	2006-08-24	morning	Sunny	Winged	0
13	2006-08-24	afternoon	Rainy	Winged	0
13	2006-08-25	afternoon	Cloudy	Winged	0
13	2006-08-26	morning	Sunny	Winged	3
13	2006-08-26	afternoon	Cloudy	Winged	1
13	2006-08-27	morning	Cloudy	Winged	2
13	2006-08-27	afternoon	Cloudy	Winged	0
13	2006-08-28	morning	Cloudy	Winged	0
13	2006-08-29	morning	Rainy	Winged	0
13	2006-08-29	afternoon	Sunny	Winged	0
13	2006-08-30	morning	Sunny	Winged	2
13	2006-08-31	afternoon	Cloudy	Winged	0
14	2006-08-16	morning	Rainy	Winged	0
14	2006-08-16	afternoon	Sunny	Winged	1
14	2006-08-17	morning	Sunny	Winged	2
14	2006-08-17	afternoon	Sunny	Winged	0
14	2006-08-18	morning	Cloudy	Winged	0
14	2006-08-18	afternoon	Sunny	Winged	3
14	2006-08-21	morning	Cloudy	Winged	0
14	2006-08-21	afternoon	Cloudy	Winged	0
14	2006-08-22	morning	Cloudy	Winged	0
14	2006-08-22	afternoon	Cloudy	Winged	0
14	2006-08-23	morning	Sunny	Winged	5
14	2006-08-23	afternoon	Sunny	Winged	0
14	2006-08-24	morning	Sunny	Winged	0
14	2006-08-24	afternoon	Rainy	Winged	0
14	2006-08-25	afternoon	Cloudy	Winged	0
14	2006-08-26	morning	Sunny	Winged	3
14	2006-08-26	afternoon	Cloudy	Winged	1
14	2006-08-27	morning	Cloudy	Winged	1
14	2006-08-27	afternoon	Cloudy	Winged	0
14	2006-08-28	morning	Cloudy	Winged	1
14	2006-08-29	morning	Rainy	Winged	0
14	2006-08-29	afternoon	Sunny	Winged	0
14	2006-08-30	morning	Sunny	Winged	1
14	2006-08-31	afternoon	Cloudy	Winged	0
15	2006-08-16	morning	Rainy	Winged	0
15	2006-08-16	afternoon	Sunny	Winged	2
15	2006-08-17	morning	Sunny	Winged	1
15	2006-08-17	afternoon	Sunny	Winged	0
15	2006-08-18	morning	Cloudy	Winged	0
15	2006-08-18	afternoon	Sunny	Winged	1
15	2006-08-21	morning	Cloudy	Winged	0
15	2006-08-21	afternoon	Cloudy	Winged	0
15	2006-08-22	morning	Cloudy	Winged	1
15	2006-08-22	afternoon	Cloudy	Winged	1
15	2006-08-23	morning	Sunny	Winged	0
15	2006-08-23	afternoon	Sunny	Winged	5
15	2006-08-24	morning	Sunny	Winged	3
15	2006-08-24	afternoon	Rainy	Winged	1
15	2006-08-25	afternoon	Cloudy	Winged	1
15	2006-08-26	morning	Sunny	Winged	2
15	2006-08-26	afternoon	Cloudy	Winged	0
15	2006-08-27	morning	Cloudy	Winged	4
15	2006-08-27	afternoon	Cloudy	Winged	1
15	2006-08-28	morning	Cloudy	Winged	1
15	2006-08-29	morning	Rainy	Winged	0
15	2006-08-29	afternoon	Sunny	Winged	0
15	2006-08-30	morning	Sunny	Winged	1
15	2006-08-31	afternoon	Cloudy	Winged	0
16	2006-08-16	morning	Rainy	Winged	0
16	2006-08-16	afternoon	Sunny	Winged	0
16	2006-08-17	morning	Sunny	Winged	0
16	2006-08-17	afternoon	Sunny	Winged	0
16	2006-08-18	morning	Cloudy	Winged	0
16	2006-08-18	afternoon	Sunny	Winged	1
16	2006-08-21	morning	Cloudy	Winged	0
16	2006-08-21	afternoon	Cloudy	Winged	0
16	2006-08-22	morning	Cloudy	Winged	0
16	2006-08-22	afternoon	Cloudy	Winged	1
16	2006-08-23	morning	Sunny	Winged	3
16	2006-08-23	afternoon	Sunny	Winged	1
16	2006-08-24	morning	Sunny	Winged	2
16	2006-08-24	afternoon	Rainy	Winged	0
16	2006-08-25	afternoon	Cloudy	Winged	0
16	2006-08-26	morning	Sunny	Winged	4
16	2006-08-26	afternoon	Cloudy	Winged	0
16	2006-08-27	morning	Cloudy	Winged	0
16	2006-08-27	afternoon	Cloudy	Winged	2
16	2006-08-28	morning	Cloudy	Winged	1
16	2006-08-29	morning	Rainy	Winged	0
16	2006-08-29	afternoon	Sunny	Winged	1
16	2006-08-30	morning	Sunny	Winged	1
16	2006-08-31	afternoon	Cloudy	Winged	0
17	2006-08-16	morning	Rainy	Winged	0
17	2006-08-16	afternoon	Sunny	Winged	3
17	2006-08-17	morning	Sunny	Winged	4
17	2006-08-17	afternoon	Sunny	Winged	1
17	2006-08-18	morning	Cloudy	Winged	1
17	2006-08-18	afternoon	Sunny	Winged	0
17	2006-08-21	morning	Cloudy	Winged	4
17	2006-08-21	afternoon	Cloudy	Winged	2
17	2006-08-22	morning	Cloudy	Winged	0
17	2006-08-22	afternoon	Cloudy	Winged	2
17	2006-08-23	morning	Sunny	Winged	2
17	2006-08-23	afternoon	Sunny	Winged	1
17	2006-08-24	morning	Sunny	Winged	0
17	2006-08-24	afternoon	Rainy	Winged	0
17	2006-08-25	afternoon	Cloudy	Winged	0
17	2006-08-26	morning	Sunny	Winged	1
17	2006-08-26	afternoon	Cloudy	Winged	1
17	2006-08-27	morning	Cloudy	Winged	0
17	2006-08-27	afternoon	Cloudy	Winged	0
17	2006-08-28	morning	Cloudy	Winged	1
17	2006-08-29	morning	Rainy	Winged	0
17	2006-08-29	afternoon	Sunny	Winged	0
17	2006-08-30	morning	Sunny	Winged	3
17	2006-08-31	afternoon	Cloudy	Winged	1
18	2006-08-16	morning	Rainy	Winged	0
18	2006-08-16	afternoon	Sunny	Winged	2
18	2006-08-17	morning	Sunny	Winged	2
18	2006-08-17	afternoon	Sunny	Winged	2
18	2006-08-18	morning	Cloudy	Winged	1
18	2006-08-18	afternoon	Sunny	Winged	2
18	2006-08-21	morning	Cloudy	Winged	1
18	2006-08-21	afternoon	Cloudy	Winged	0
18	2006-08-22	morning	Cloudy	Winged	1
18	2006-08-22	afternoon	Cloudy	Winged	0
18	2006-08-23	morning	Sunny	Winged	1
18	2006-08-23	afternoon	Sunny	Winged	4
18	2006-08-24	morning	Sunny	Winged	4
18	2006-08-24	afternoon	Rainy	Winged	0
18	2006-08-25	afternoon	Cloudy	Winged	0
18	2006-08-26	morning	Sunny	Winged	2
18	2006-08-26	afternoon	Cloudy	Winged	1
18	2006-08-27	morning	Cloudy	Winged	1
18	2006-08-27	afternoon	Cloudy	Winged	0
18	2006-08-28	morning	Cloudy	Winged	0
18	2006-08-29	morning	Rainy	Winged	0
18	2006-08-29	afternoon	Sunny	Winged	1
18	2006-08-30	morning	Sunny	Winged	0
18	2006-08-31	afternoon	Cloudy	Winged	0
19	2006-08-16	morning	Rainy	Winged	1
19	2006-08-16	afternoon	Sunny	Winged	1
19	2006-08-17	morning	Sunny	Winged	1
19	2006-08-17	afternoon	Sunny	Winged	1
19	2006-08-18	morning	Cloudy	Winged	0
19	2006-08-18	afternoon	Sunny	Winged	1
19	2006-08-21	morning	Cloudy	Winged	1
19	2006-08-21	afternoon	Cloudy	Winged	2
19	2006-08-22	morning	Cloudy	Winged	2
19	2006-08-22	afternoon	Cloudy	Winged	1
19	2006-08-23	morning	Sunny	Winged	2
19	2006-08-23	afternoon	Sunny	Winged	5
19	2006-08-24	morning	Sunny	Winged	2
19	2006-08-24	afternoon	Rainy	Winged	0
19	2006-08-25	afternoon	Cloudy	Winged	0
19	2006-08-26	morning	Sunny	Winged	0
19	2006-08-26	afternoon	Cloudy	Winged	0
19	2006-08-27	morning	Cloudy	Winged	1
19	2006-08-27	afternoon	Cloudy	Winged	0
19	2006-08-28	morning	Cloudy	Winged	1
19	2006-08-29	morning	Rainy	Winged	0
19	2006-08-29	afternoon	Sunny	Winged	0
19	2006-08-30	morning	Sunny	Winged	1
19	2006-08-31	afternoon	Cloudy	Winged	3
20	2006-08-16	morning	Rainy	Winged	0
20	2006-08-16	afternoon	Sunny	Winged	3
20	2006-08-17	morning	Sunny	Winged	2
20	2006-08-17	afternoon	Sunny	Winged	3
20	2006-08-18	morning	Cloudy	Winged	1
20	2006-08-18	afternoon	Sunny	Winged	0
20	2006-08-21	morning	Cloudy	Winged	2
20	2006-08-21	afternoon	Cloudy	Winged	0
20	2006-08-22	morning	Cloudy	Winged	2
20	2006-08-22	afternoon	Cloudy	Winged	3
20	2006-08-23	morning	Sunny	Winged	4
20	2006-08-23	afternoon	Sunny	Winged	2
20	2006-08-24	morning	Sunny	Winged	3
20	2006-08-24	afternoon	Rainy	Winged	0
20	2006-08-25	afternoon	Cloudy	Winged	4
20	2006-08-26	morning	Sunny	Winged	6
20	2006-08-26	afternoon	Cloudy	Winged	1
20	2006-08-27	morning	Cloudy	Winged	4
20	2006-08-27	afternoon	Cloudy	Winged	5
20	2006-08-28	morning	Cloudy	Winged	4
20	2006-08-29	morning	Rainy	Winged	0
20	2006-08-29	afternoon	Sunny	Winged	1
20	2006-08-30	morning	Sunny	Winged	2
20	2006-08-31	afternoon	Cloudy	Winged	2
