# Supplementary material for: Ants contribute to pollination but not to reproduction in a rare calcareous grassland forb
Source: PeerJ. 2018 Feb 19;6:e4369. doi: 10.7717/peerj.4369 (PMC5822835; doi:10.7717/peerj.4369)
Supplement: Supplemental Information 2 — Data show frequency and duration of flower visits of individual ants. [file peerj-06-4369-s002.xlsx]

## Sheet: Sheet1
		Formica cunicularia			Tapinoma erraticum
	Cyathia	Duration of visit			Cyathia	Duration of visit
Ant	visited	per cyathia [s]		Ant	visited	per cyathia [s]
1	20	8.33		1	3	16.83
2	16	5.39		2	5	59.51
3	8	19.42		3	3	28.91
4	7	12.09		4	4	13.41
5	12	13.57		5	2	71.99
6	10	26.89		6	1	144
7	9	15.16		7	4	39.52
8	10	12.42		8	5	17.91
9	10	10.86		9	6	33.27
10	13	17.12		10	4	37.08
11	12	7.59		11	2	139.09
12	5	49.98		12	2	49.64
13	3	91.15		13	3	26.68
14	6	21.44		14	3	3.9
15	6	17.82		15	4	53.71
16	6	14.11		16	4	9.21
17	5	24.85		17	2	37.75
18	6	29.03		18	2	13.69
19	15	10.4		19	2	68.97
20	11	13.12		20	5	37.79
21	9	18.98		21	3	84.32
22	8	9.34		22	3	30.07
23	13	10.32		23	3	40.63
24	24	7.17		24	2	20.96
25	19	8.03		25	3	39.14
26	15	14.51		26	4	49.32
27	11	9.23		27	1	42.53
28	17	10.84		28	1	59.94
29	5	17.86		29	4	25.18
30	9	18.19		30	4	29.91
