# Supplementary material for: Ants contribute to pollination but not to reproduction in a rare calcareous grassland forb
Source: PeerJ. 2018 Feb 19;6:e4369. doi: 10.7717/peerj.4369 (PMC5822835; doi:10.7717/peerj.4369)
Supplement: Supplemental Information 3 — Data show numbers of individually marked ants found on E.seguieriana plants. [file peerj-06-4369-s003.xlsx]

## Sheet: Sheet1
No marked ants were found on unmarked plants.
Marked ants were found only on plants on which they had been marked at the beginning of the experiment
Number of retrieved ants per marked plant per day
Plant	Formica cunicularia				Tapinoma erraticum
	Average	SD	SE		Average	SD	SE
1	7.8	2	0.894427		1.25	1.375	0.614919
2	0.8	1.125	0.503115		0.625	1.375	0.614919
3	2.25	1.138	0.508929		0.875	1.125	0.503115
4	2.86	1.562	0.698548		0	0	0
5	3.06	2.125	0.950329		0.375	0.875	0.391312
6	9.25	3.375	1.50935		2.25	2.25	1.00623
